# Supplementary material for: Use of simulated data sets to evaluate the fidelity of metagenomic processing methods
Source: Springer Nature journal article supplement (doi:10.1038/nmeth1043), 2007-04-29

Supplementary Figure 1. Enlarged versions of panels in figure 1b,c.

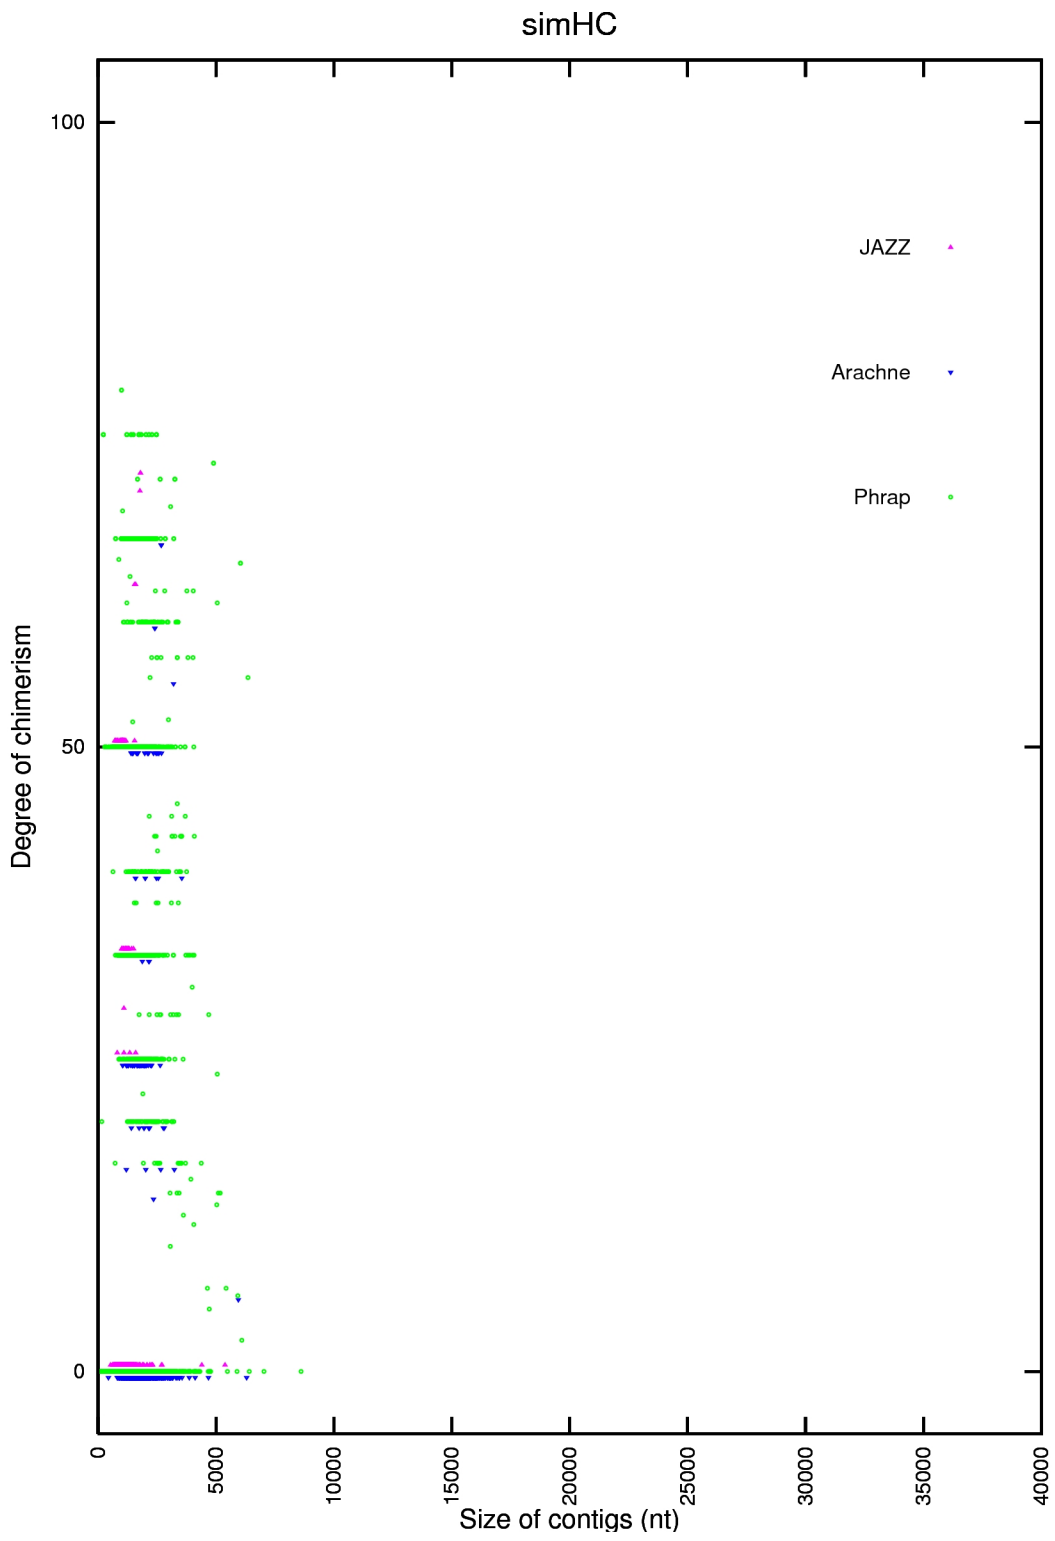

simLC

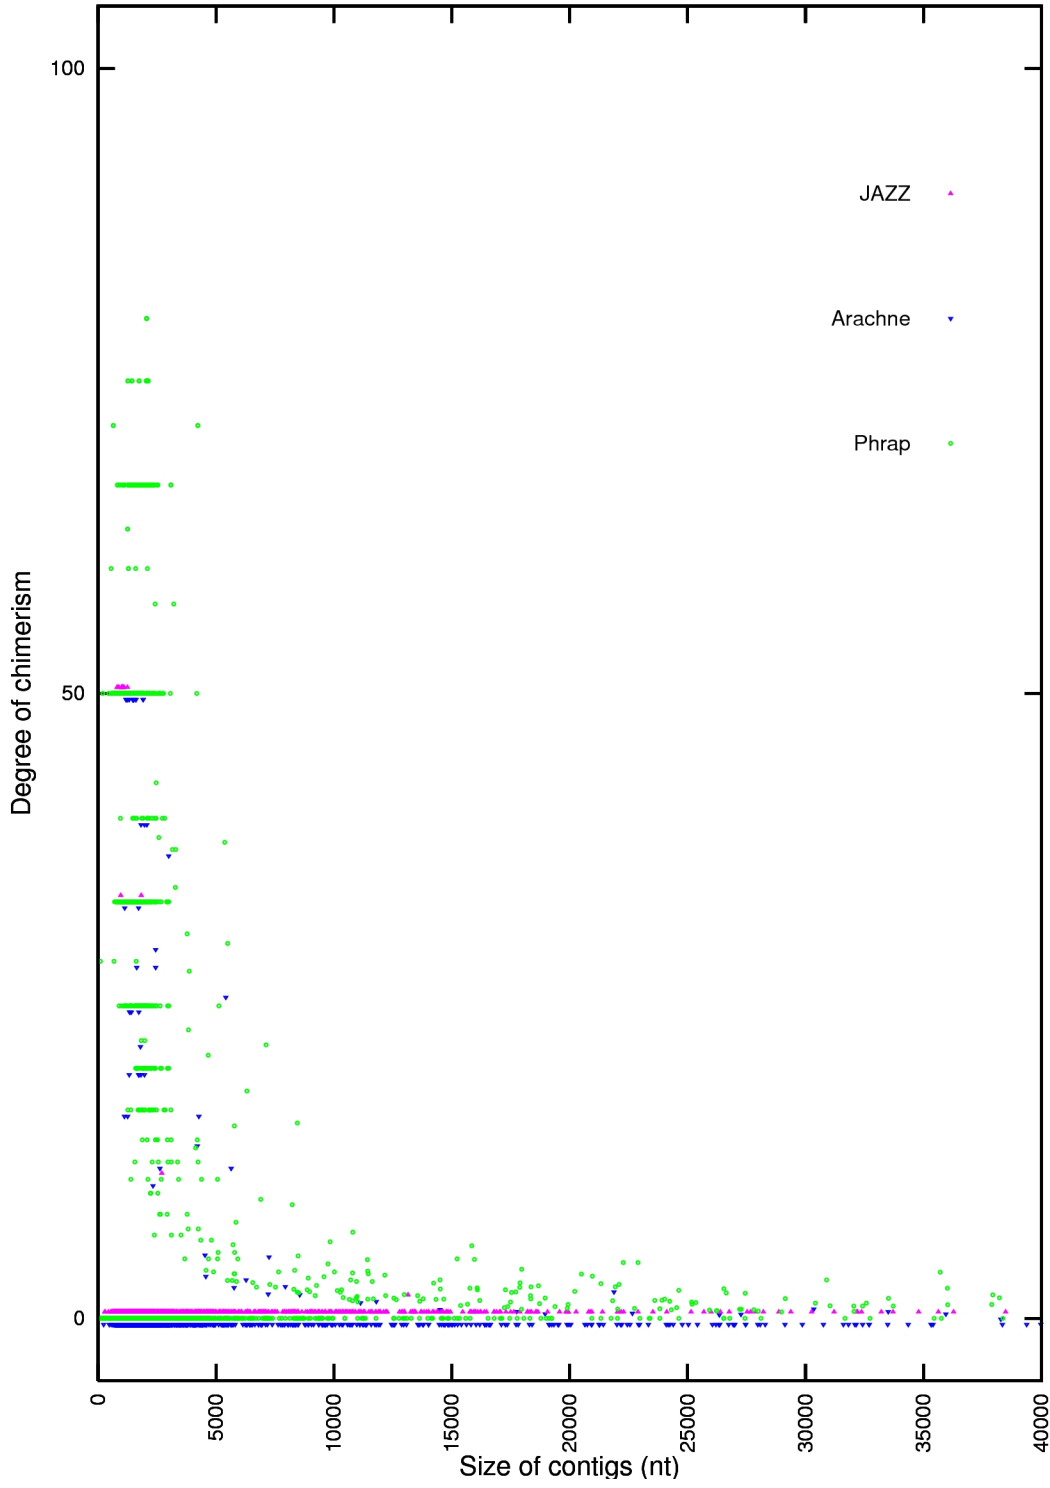

simMC

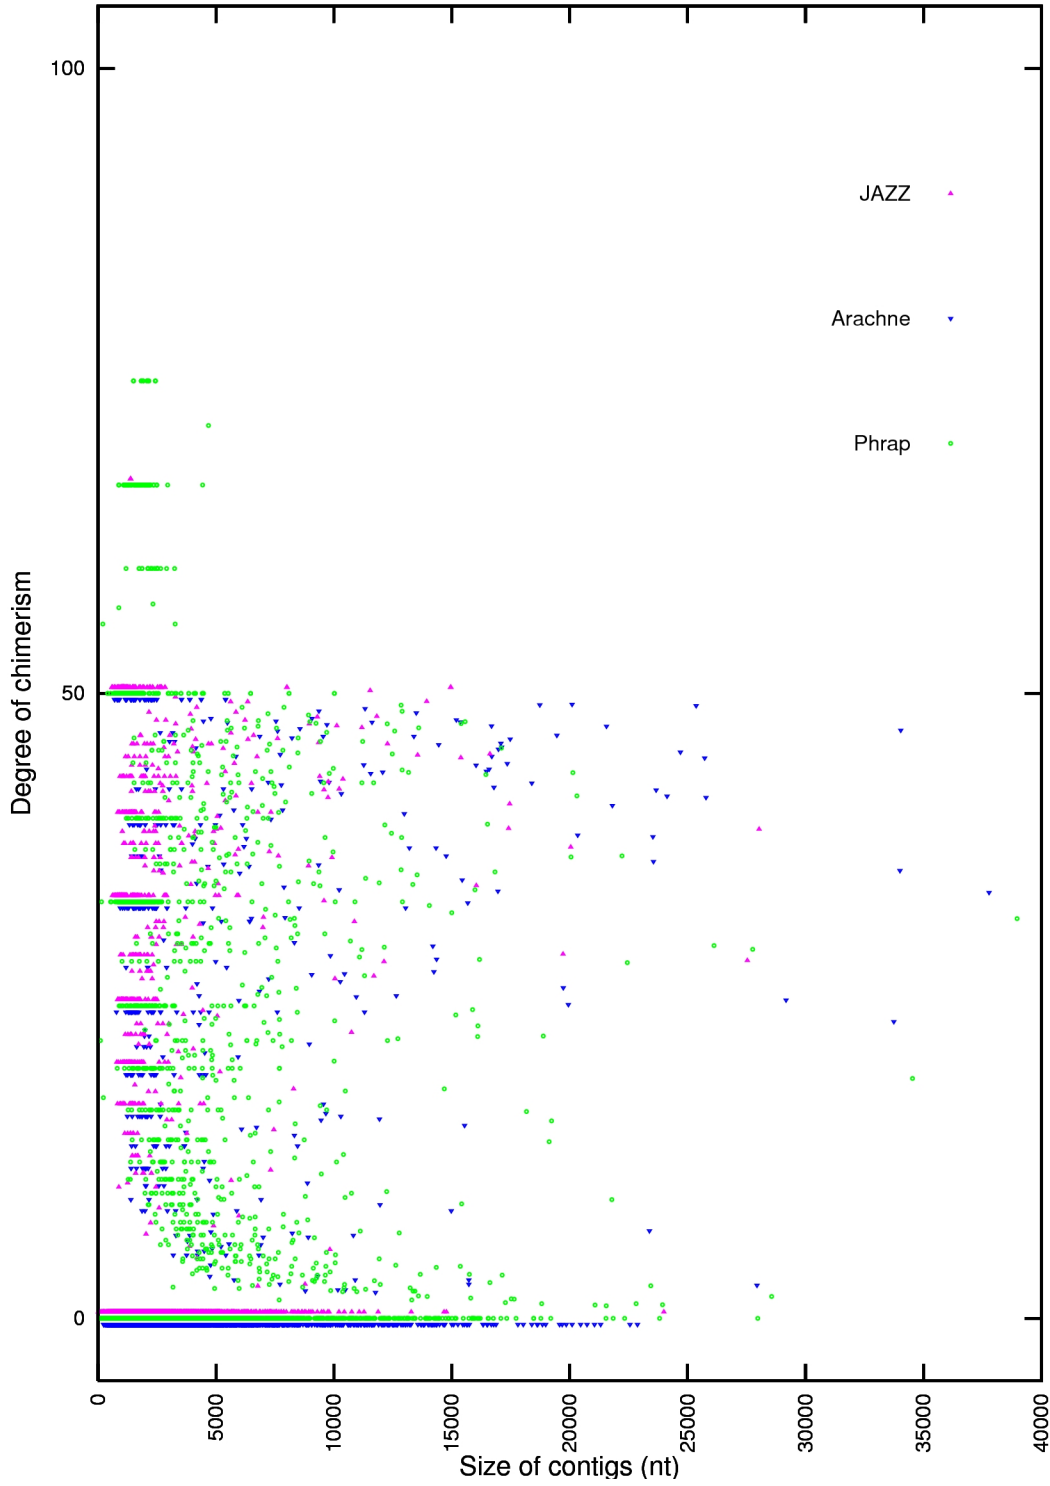

# simHC

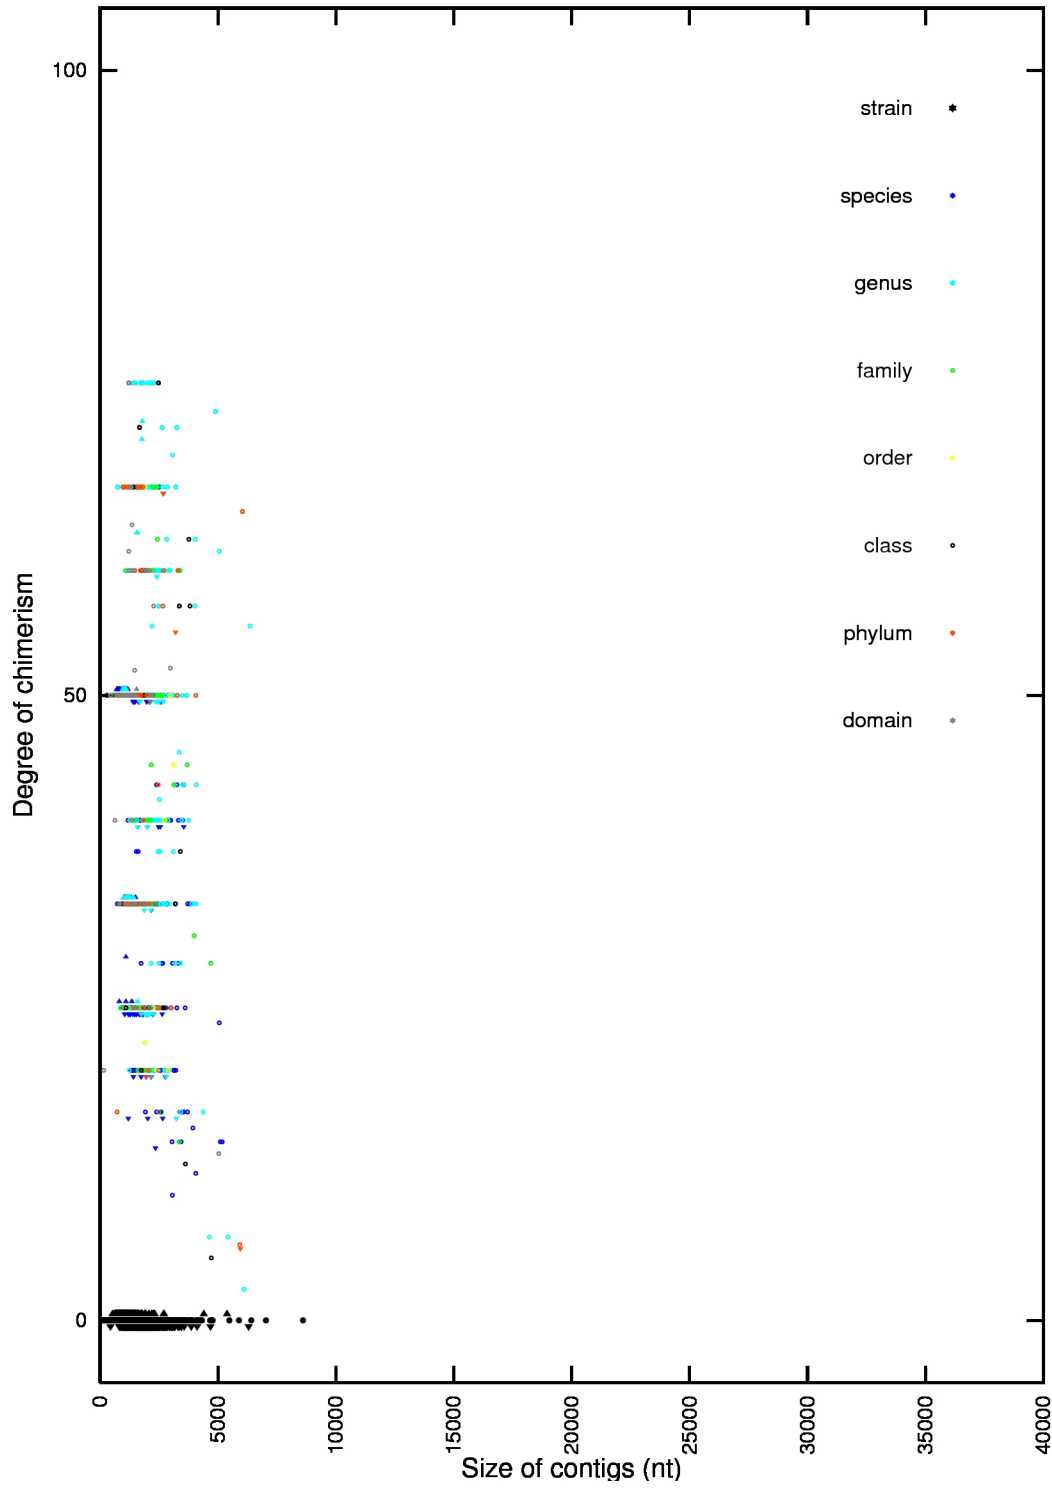



# simMC

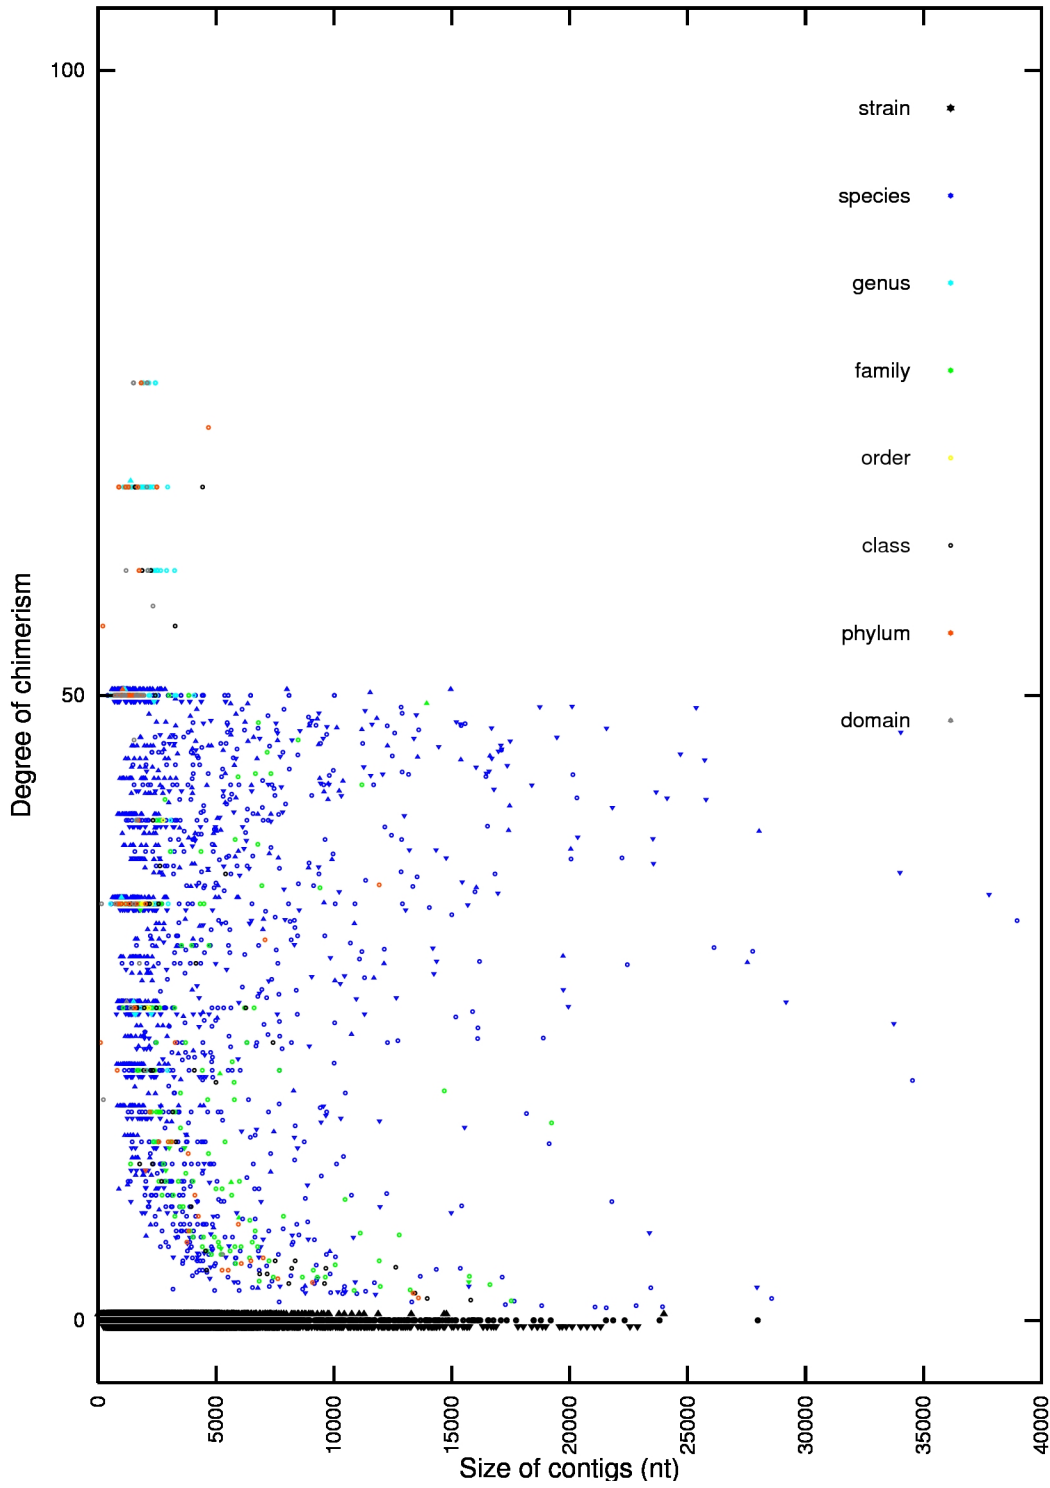

Supplement: 41592_2007_BFnmeth1043_MOESM250_ESM.pdf [file 41592_2007_BFnmeth1043_MOESM250_ESM.pdf]
