# Supplementary material for: Use of simulated data sets to evaluate the fidelity of metagenomic processing methods
Source: Springer Nature journal article supplement (doi:10.1038/nmeth1043), 2007-04-29
Supplement: 41592_2007_BFnmeth1043_MOESM252_ESM.pdf [file 41592_2007_BFnmeth1043_MOESM252_ESM.pdf]

Supplementary Table 1. Organisms used for the simulated datasets. The genome size, reads used and the corresponding number of nucleotides as well the estimated genome coverage are reported.

| dataset | organism                                                | genome size | reads | nucleotides | coverage |
|---------|---------------------------------------------------------|-------------|-------|-------------|----------|
| simMC   | Xylella fastidiosa Dixon                                | 2622328     | 10484 | 9147895     | 3.48     |
| simMC   | Rhodopseudomonas palustris BisB5                        | 4892717     | 16577 | 17010327    | 3.47     |
| simMC   | Bradyrhizobium sp. BTAi1                                | 8422430     | 22956 | 23374401    | 2.77     |
| simMC   | Xylella fastidiosa Ann-1                                | 5118933     | 10818 | 8632822     | 1.68     |
| simMC   | Rhodopseudomonas palustris BisB18                       | 5513844     | 6107  | 6238808     | 1.13     |
| simMC   | Rhodospirillum rubrum ATCC 11170                        | 4406557     | 4868  | 4501381     | 1.02     |
| simMC   | Moorella thermoacetica ATCC 39073                       | 2628784     | 765   | 737103      | 0.28     |
| simMC   | Rubrobacter xylanophilus DSM 9941                       | 3299423     | 444   | 509433      | 0.15     |
| simMC   | Thiobacillus denitrificans ATCC 25259                   | 2909809     | 400   | 444390      | 0.15     |
| simMC   | Actinobacillus succinogenes 130Z                        | 2046146     | 290   | 303838      | 0.14     |
| simMC   | Ehrlichia canis Jake                                    | 1315030     | 197   | 191239      | 0.14     |
| simMC   | Ehrlichia chaffeensis sapulpa                           | 1005812     | 155   | 141753      | 0.14     |
| simMC   | Chlorobium vibrioforme f. thiosulfatophilum DSMZ 265(T) | 1980186     | 286   | 271777      | 0.13     |
| simMC   | Polaromonas sp. JS666                                   | 5898676     | 769   | 771898      | 0.13     |
| simMC   | Pseudoalteromonas atlantica T6c                         | 5094958     | 657   | 683508      | 0.13     |
| simMC   | Silicibacter sp. TM1040                                 | 4198271     | 470   | 550475      | 0.13     |
| simMC   | Thiomicrospira denitrificans ATCC 33889                 | 2201561     | 312   | 299145      | 0.13     |
| simMC   | Burkholderia ambifaria AMMD                             | 7503613     | 926   | 928391      | 0.12     |
| simMC   | Burkholderia sp. sp.strain 383                          | 8676277     | 1024  | 1078267     | 0.12     |
| simMC   | Chlorobium limicola DSMZ 245(T)                         | 2761915     | 353   | 331866      | 0.12     |
| simMC   | Chloroflexus aurantiacus J-10-fl                        | 5193782     | 668   | 664910      | 0.12     |
| simMC   | Clostridium beijerincki NCIMB 8052                      | 5952522     | 702   | 730277      | 0.12     |
| simMC   | Clostridium thermocellum ATCC 27405                     | 3894953     | 494   | 470211      | 0.12     |
| simMC   | Crocospaera watsonii WH 8501                            | 6285399     | 776   | 810164      | 0.12     |
| simMC   | Deinococcus geothermalis DSM11300                       | 3164085     | 404   | 389579      | 0.12     |
| simMC   | Jannaschia sp. CCS1                                     | 4404049     | 543   | 531512      | 0.12     |
| simMC   | Kineococcus radiotolerans SRS30216                      | 4893957     | 580   | 599807      | 0.12     |
| simMC   | Lactobacillus gasseri ATCC33323                         | 1950210     | 258   | 245633      | 0.12     |
| simMC   | Lactococcus lactis subsp. cremoris                      | 2613164     | 345   | 314828      | 0.12     |
| simMC   | Marinobacter aquaeolei VT8                              | 4647952     | 586   | 583122      | 0.12     |
| simMC   | Methanospirillum hungatei JF-1                          | 3544738     | 459   | 440571      | 0.12     |
| simMC   | Nitrosospira multiformis ATCC 25196                     | 3234309     | 420   | 409131      | 0.12     |
| simMC   | Nocardioides sp. JS614                                  | 5394058     | 691   | 684954      | 0.12     |
| simMC   | Novosphingobium aromaticivorans DSM 12444 (F199)        | 3561584     | 536   | 440461      | 0.12     |
| simMC   | Pelobacter propionicus                                  | 4466736     | 550   | 546764      | 0.12     |
| simMC   | Pelodictyon luteolum                                    | 2364842     | 314   | 299942      | 0.12     |
| simMC   | Prochlorococcus marinus str. MIT 9312                   | 1709204     | 218   | 207226      | 0.12     |
| simMC   | Pseudomonas putida F1                                   | 5925059     | 745   | 759885      | 0.12     |
| simMC   | Rhodopseudomonas palustris BisA53                       | 5502424     | 680   | 693879      | 0.12     |
| simMC   | Rhodopseudomonas palustris HaA2                         | 5331656     | 671   | 644332      | 0.12     |
| simMC   | Shewanella baltica OS155                                | 5084318     | 649   | 613932      | 0.12     |
| simMC   | Streptococcus suis 89/1591                              | 1978218     | 276   | 245918      | 0.12     |
| simMC   | Syntrophomonas wolfei Goettingen                        | 2845772     | 363   | 362362      | 0.12     |
| simMC   | Alkalilimnicola ehrlichei MLHE-1                        | 3272789     | 384   | 387545      | 0.11     |
| simMC   | Anabaena variabilis ATCC 29413                          | 7105752     | 881   | 810555      | 0.11     |
| simMC   | Anaeromyxobacter dehalogenans 2CP-C                     | 5013479     | 578   | 580762      | 0.11     |
| simMC   | Arthrobacter sp. FB24                                   | 5011599     | 613   | 599484      | 0.11     |
| simMC   | Azotobacter vinelandii AvOP                             | 5352434     | 652   | 607599      | 0.11     |
| simMC   | Bacillus cereus NVH391-98                               | 3915845     | 454   | 462654      | 0.11     |
| simMC   | Burkholderia cenocepacia AU 1054                        | 7249477     | 917   | 867079      | 0.11     |
| simMC   | Burkholderia cenocepacia HI2424                         | 8139086     | 1010  | 947329      | 0.11     |
| simMC   | Burkholderia vietnamiensis strain G4 (R1808)            | 8410976     | 985   | 979809      | 0.11     |
| simMC   | Caldicellulosiruptor accharolyticus                     | 2788317     | 316   | 323165      | 0.11     |
| simMC   | Chlorobium phaeobacteroides DSMZ 266(T)                 | 3114286     | 390   | 373698      | 0.11     |
| simMC   | Exiguobacterium 255-15                                  | 2894116     | 392   | 336293      | 0.11     |
| simMC   | Ferroplasma acidarmanus fer1                            | 1971391     | 264   | 221075      | 0.11     |
| simMC   | Frankia sp. Ccl3                                        | 5433628     | 643   | 630395      | 0.11     |
| simMC   | Frankia sp. EAN1pec                                     | 9081415     | 1111  | 1070877     | 0.11     |
| simMC   | Geobacter metallireducens GS-15                         | 4011182     | 520   | 479332      | 0.11     |
| simMC   | Haemophilus somnus 129PT                                | 2008359     | 265   | 236374      | 0.11     |
| simMC   | Lactobacillus casei ATCC334                             | 2760660     | 344   | 315848      | 0.11     |
| simMC   | Methanococcoides burtonii DSM6242                       | 2575032     | 318   | 300391      | 0.11     |
| simMC   | Nitrosococcus oceani                                    | 3522111     | 406   | 390952      | 0.11     |
| simMC   | Nitrosomonas eutropha C71                               | 2711982     | 320   | 313513      | 0.11     |
| simMC   | Paracoccus denitrificans PD1222                         | 5175736     | 620   | 593608      | 0.11     |
| simMC   | Pelobacter carbinolicus DSM 2380                        | 3662252     | 472   | 416477      | 0.11     |
| simMC   | Pelodictyon phaeoclathratiforme BU-1 (DSMZ 5477(T))     | 3000217     | 359   | 346470      | 0.11     |
| simMC   | Psychrobacter cryopegella                               | 3101097     | 366   | 344213      | 0.11     |
| simMC   | Rhodoferax ferrireducens                                | 4969784     | 588   | 550383      | 0.11     |
| simMC   | Saccharophagus degradans 2-40                           | 5057531     | 642   | 593769      | 0.11     |

|       |                                                         |         |      |        |      |
|-------|---------------------------------------------------------|---------|------|--------|------|
| simMC | Shewanella frigidimarina NCMB400                        | 4782427 | 559  | 548372 | 0.11 |
| simMC | Shewanella putefaciens                                  | 4577697 | 530  | 512393 | 0.11 |
| simMC | Shewanella sp. ANA-3                                    | 5100729 | 586  | 592816 | 0.11 |
| simMC | Shewanella sp. MR-7                                     | 4546355 | 515  | 535966 | 0.11 |
| simMC | Shewanella sp. PV-4                                     | 4474526 | 537  | 511312 | 0.11 |
| simMC | Shewanella sp. W3-18-1                                  | 4754010 | 532  | 525884 | 0.11 |
| simMC | Sphingopyxis alaskensis RB2256                          | 3343420 | 402  | 384382 | 0.11 |
| simMC | Thiomicrospira crunogena XCL-2                          | 2427734 | 296  | 284598 | 0.11 |
| simMC | Trichodesmium erythraeum IMS101                         | 7750108 | 927  | 895973 | 0.11 |
| simMC | Alkaliphillus metalliredigenes                          | 4410303 | 504  | 461558 | 0.1  |
| simMC | Chromohalobacter salexigens DSM3043                     | 4404049 | 481  | 450407 | 0.1  |
| simMC | Cytophaga hutchinsonii ATCC 33406                       | 4433218 | 580  | 465268 | 0.1  |
| simMC | Dechloromonas aromatica RCB                             | 4501104 | 559  | 474967 | 0.1  |
| simMC | Desulfotobacterium hafniense DCB-2                      | 6083768 | 725  | 640463 | 0.1  |
| simMC | Desulfovibrio desulfuricans G20                         | 3730232 | 424  | 386576 | 0.1  |
| simMC | Lactobacillus brevis ATCC367                            | 1880818 | 247  | 205125 | 0.1  |
| simMC | Leuconostoc mesenteroides ATCC 8293                     | 1976579 | 241  | 210753 | 0.1  |
| simMC | Magnetococcus sp. MC-1                                  | 4628740 | 520  | 489632 | 0.1  |
| simMC | Mesorhizobium sp. BNC1                                  | 4977960 | 605  | 499139 | 0.1  |
| simMC | Methanosarcina barkeri Fusaro                           | 4873766 | 608  | 510863 | 0.1  |
| simMC | Methylobacillus flagellatus strain KT                   | 2971517 | 321  | 324880 | 0.1  |
| simMC | Nitrobacter hamburgensis                                | 5011522 | 568  | 528059 | 0.1  |
| simMC | Nitrobacter winogradskyi Nb-255                         | 3402093 | 358  | 347847 | 0.1  |
| simMC | Oenococcus oeni PSU-1                                   | 1782786 | 221  | 190672 | 0.1  |
| simMC | Prosthecochloris aestuarii SK413/DSMZ 271(t)            | 2563197 | 269  | 263342 | 0.1  |
| simMC | Prosthecochloris sp. BS1                                | 4444192 | 515  | 475505 | 0.1  |
| simMC | Pseudomonas syringae B728a                              | 6093698 | 738  | 664767 | 0.1  |
| simMC | Shewanella amazonensis                                  | 4264533 | 482  | 459786 | 0.1  |
| simMC | Synechococcus sp. PCC 7942 (elongatus)                  | 2695903 | 309  | 271858 | 0.1  |
| simMC | Syntrophobacter fumaroxidans MPOB                       | 4848841 | 552  | 506326 | 0.1  |
| simMC | Thermoanaerobacter ethanolicus 39E                      | 2282740 | 265  | 250034 | 0.1  |
| simMC | Brevibacterium linens BL2                               | 4510745 | 506  | 437122 | 0.09 |
| simMC | Burkholderia xenovorans LB400                           | 9731138 | 1146 | 940345 | 0.09 |
| simMC | Enterococcus faecium DO                                 | 2848380 | 360  | 260693 | 0.09 |
| simMC | Lactobacillus delbrueckii subsp. bulgaricus ATCCBAA-365 | 1629380 | 203  | 157309 | 0.09 |
| simMC | Prochlorococcus sp. NATL2A                              | 1842899 | 191  | 182303 | 0.09 |
| simMC | Pseudomonas fluorescens PfO-1                           | 6438405 | 791  | 638627 | 0.09 |
| simMC | Psychrobacter arcticum 273-4                            | 2650701 | 329  | 258993 | 0.09 |
| simMC | Thermobifida fusca YX                                   | 3642249 | 431  | 350085 | 0.09 |
| simMC | Bifidobacterium longum DJO10A                           | 2375286 | 235  | 193729 | 0.08 |
| simMC | Pediococcus pentosaceus ATCC25745                       | 1814631 | 173  | 147165 | 0.08 |
| simMC | Rhodobacter sphaeroides 2.4.1                           | 4603060 | 528  | 408870 | 0.08 |
| simMC | Streptococcus thermophilus LMD-9                        | 1842121 | 187  | 155973 | 0.08 |

| dataset | organism                              | genome size | reads | nucleotides | coverage |
|---------|---------------------------------------|-------------|-------|-------------|----------|
| simLC   | Rhodopseudomonas palustris HaA2       | 5331656     | 28861 | 27684394    | 5.19     |
| simLC   | Bradyrhizobium sp. BTAi1              | 8422430     | 9277  | 9432593     | 1.11     |
| simLC   | Cytophaga hutchinsonii ATCC 33406     | 4433218     | 5168  | 4132410     | 0.93     |
| simLC   | Xylella fastidiosa Ann-1              | 5118933     | 2836  | 2263183     | 0.44     |
| simLC   | Moorella thermoacetica ATCC 39073     | 2628784     | 674   | 667732      | 0.25     |
| simLC   | Xylella fastidiosa Dixon              | 2622328     | 601   | 527819      | 0.2      |
| simLC   | Ehrlichia canis Jake                  | 1315030     | 196   | 192979      | 0.14     |
| simLC   | Rubrobacter xylanophilus DSM 9941     | 3299423     | 409   | 472860      | 0.14     |
| simLC   | Thiobacillus denitrificans ATCC 25259 | 2909809     | 395   | 432598      | 0.14     |
| simLC   | Bacillus cereus NVH391-98             | 3915845     | 520   | 530628      | 0.13     |
| simLC   | Burkholderia sp. sp.strain 383        | 8676277     | 1074  | 1134915     | 0.13     |
| simLC   | Caldicellulosiruptor accharolyticus   | 2788317     | 367   | 374864      | 0.13     |
| simLC   | Chloroflexus aurantiacus J-10-fl      | 5193782     | 679   | 676090      | 0.13     |
| simLC   | Clostridium beijerincki NCIMB 8052    | 5952522     | 737   | 774306      | 0.13     |
| simLC   | Crocospaera watsonii WH 8501          | 6285399     | 812   | 853754      | 0.13     |
| simLC   | Ehrlichia chaffeensis sapulpa         | 1005812     | 150   | 137612      | 0.13     |
| simLC   | Prochlorococcus sp. NATL2A            | 1842899     | 253   | 243780      | 0.13     |
| simLC   | Psychrobacter cryopegella             | 3101097     | 422   | 406224      | 0.13     |
| simLC   | Rhodopseudomonas palustris BisB18     | 5513844     | 699   | 718618      | 0.13     |
| simLC   | Shewanella sp. ANA-3                  | 5100729     | 664   | 672467      | 0.13     |
| simLC   | Shewanella sp. MR-7                   | 4546355     | 568   | 592166      | 0.13     |
| simLC   | Silicibacter sp. TM1040               | 4198271     | 469   | 547605      | 0.13     |
| simLC   | Thermoanaerobacter ethanolicus 39E    | 2282740     | 315   | 298534      | 0.13     |
| simLC   | Actinobacillus succinogenes 130Z      | 2046146     | 252   | 263514      | 0.12     |
| simLC   | Burkholderia ambifaria AMMD           | 7503613     | 955   | 966386      | 0.12     |
| simLC   | Chlorobium limicola DSMZ 245(T)       | 2761915     | 381   | 354901      | 0.12     |
| simLC   | Deinococcus geothermalis DSM11300     | 3164085     | 415   | 401474      | 0.12     |
| simLC   | Jannaschia sp. CCS1                   | 4404049     | 543   | 529621      | 0.12     |
| simLC   | Kineococcus radiotolerans SRS30216    | 4893957     | 566   | 588484      | 0.12     |

|       |                                                         |         |      |         |      |
|-------|---------------------------------------------------------|---------|------|---------|------|
| simLC | Methylobacillus flagellatus strain KT                   | 2971517 | 365  | 369843  | 0.12 |
| simLC | Nitrobacter winogradskyi Nb-255                         | 3402093 | 427  | 414571  | 0.12 |
| simLC | Novosphingobium aromaticivorans DSM 12444 (F199)        | 3561584 | 520  | 446895  | 0.12 |
| simLC | Pelodictyon phaeoclathratiforme BU-1 (DSMZ 5477(T))     | 3000217 | 402  | 384821  | 0.12 |
| simLC | Polaromonas sp. JS666                                   | 5898676 | 733  | 737085  | 0.12 |
| simLC | Pseudoalteromonas atlantica T6c                         | 5094958 | 588  | 615147  | 0.12 |
| simLC | Rhodopseudomonas palustris BisB5                        | 4892717 | 575  | 593532  | 0.12 |
| simLC | Sphingopyxis alaskensis RB2256                          | 3343420 | 438  | 415701  | 0.12 |
| simLC | Thiomicrospira denitrificans ATCC 33889                 | 2201561 | 277  | 268886  | 0.12 |
| simLC | Trichodesmium erythraeum IMS101                         | 7750108 | 977  | 954106  | 0.12 |
| simLC | Alkalilimnicola ehrlichei MLHE-1                        | 3272789 | 373  | 374946  | 0.11 |
| simLC | Anabaena variabilis ATCC 29413                          | 7105752 | 855  | 795384  | 0.11 |
| simLC | Anaeromyxobacter dehalogenans 2CP-C                     | 5013479 | 584  | 590941  | 0.11 |
| simLC | Arthrobacter sp. FB24                                   | 5011599 | 570  | 556264  | 0.11 |
| simLC | Azotobacter vinelandii AvOP                             | 5352434 | 650  | 601559  | 0.11 |
| simLC | Burkholderia cenocepacia AU 1054                        | 7249477 | 879  | 833042  | 0.11 |
| simLC | Burkholderia cenocepacia HI2424                         | 8139086 | 956  | 907846  | 0.11 |
| simLC | Burkholderia vietnamiensis strain G4 (R1808)            | 8410976 | 992  | 996433  | 0.11 |
| simLC | Clostridium thermocellum ATCC 27405                     | 3894953 | 461  | 435152  | 0.11 |
| simLC | Desulfotobacterium hafniense DCB-2                      | 6083768 | 769  | 684554  | 0.11 |
| simLC | Desulfovibrio desulfuricans G20                         | 3730232 | 484  | 436153  | 0.11 |
| simLC | Exiguobacterium 255-15                                  | 2894116 | 377  | 329023  | 0.11 |
| simLC | Frankia sp. Ccl3                                        | 5433628 | 645  | 625569  | 0.11 |
| simLC | Frankia sp. EAN1pec                                     | 9081415 | 1109 | 1070299 | 0.11 |
| simLC | Geobacter metallireducens GS-15                         | 4011182 | 515  | 469635  | 0.11 |
| simLC | Lactobacillus casei ATCC334                             | 2760660 | 362  | 330900  | 0.11 |
| simLC | Lactobacillus gasseri ATCC33323                         | 1950210 | 244  | 231961  | 0.11 |
| simLC | Marinobacter aquaeolei VT8                              | 4647952 | 547  | 542695  | 0.11 |
| simLC | Methanospirillum hungatei JF-1                          | 3544738 | 429  | 412292  | 0.11 |
| simLC | Nitrobacter hamburgensis                                | 5011522 | 630  | 592565  | 0.11 |
| simLC | Nitrosococcus oceani                                    | 3522111 | 409  | 398323  | 0.11 |
| simLC | Nitrosomonas eutropha C71                               | 2711982 | 314  | 313955  | 0.11 |
| simLC | Nitrosospora multiformis ATCC 25196                     | 3234309 | 378  | 366210  | 0.11 |
| simLC | Nocardioides sp. JS614                                  | 5394058 | 636  | 632236  | 0.11 |
| simLC | Pelobacter carbinolicus DSM 2380                        | 3662252 | 489  | 425000  | 0.11 |
| simLC | Pelobacter propionicus                                  | 4466736 | 508  | 505009  | 0.11 |
| simLC | Pseudomonas putida F1                                   | 5925059 | 675  | 687896  | 0.11 |
| simLC | Pseudomonas syringae B728a                              | 6093698 | 746  | 673596  | 0.11 |
| simLC | Rhodoferax ferrireducens                                | 4969784 | 599  | 563098  | 0.11 |
| simLC | Rhodopseudomonas palustris BisA53                       | 5502424 | 636  | 648905  | 0.11 |
| simLC | Rhodospirillum rubrum ATCC 11170                        | 4406557 | 559  | 519746  | 0.11 |
| simLC | Shewanella amazonensis                                  | 4264533 | 536  | 497450  | 0.11 |
| simLC | Shewanella baltica OS155                                | 5084318 | 621  | 589065  | 0.11 |
| simLC | Shewanella frigidimarina NCMB400                        | 4782427 | 551  | 539657  | 0.11 |
| simLC | Shewanella putefaciens                                  | 4577697 | 565  | 537581  | 0.11 |
| simLC | Shewanella sp. PV-4                                     | 4474526 | 524  | 502771  | 0.11 |
| simLC | Streptococcus suis 89/1591                              | 1978218 | 263  | 234214  | 0.11 |
| simLC | Syntrophobacter fumaroxidans MPOB                       | 4848841 | 606  | 561886  | 0.11 |
| simLC | Alkaliphillus metallireducens                           | 4410303 | 489  | 452259  | 0.1  |
| simLC | Bifidobacterium longum DJO10A                           | 2375286 | 288  | 238822  | 0.1  |
| simLC | Brevibacterium linens BL2                               | 4510745 | 542  | 465883  | 0.1  |
| simLC | Chlorobium phaeobacteroides DSMZ 266(T)                 | 3114286 | 359  | 339279  | 0.1  |
| simLC | Dechloromonas aromatica RCB                             | 4501104 | 537  | 455726  | 0.1  |
| simLC | Ferroplasma acidarmanus fer1                            | 1971391 | 238  | 201766  | 0.1  |
| simLC | Haemophilus somnus 129PT                                | 2008359 | 232  | 208703  | 0.1  |
| simLC | Lactococcus lactis subsp. cremoris                      | 2613164 | 301  | 267507  | 0.1  |
| simLC | Leuconostoc mesenteroides ATCC 8293                     | 1976579 | 235  | 199695  | 0.1  |
| simLC | Magnetococcus sp. MC-1                                  | 4628740 | 504  | 479512  | 0.1  |
| simLC | Paracoccus denitrificans PD1222                         | 5175736 | 585  | 556907  | 0.1  |
| simLC | Pediococcus pentosaceus ATCC25745                       | 1814631 | 217  | 189252  | 0.1  |
| simLC | Pelodictyon luteolum                                    | 2364842 | 250  | 238945  | 0.1  |
| simLC | Prochlorococcus marinus str. MIT 9312                   | 1709204 | 183  | 178782  | 0.1  |
| simLC | Prosthecochloris aestuarii SK413/DSMZ 271(t)            | 2563197 | 282  | 269231  | 0.1  |
| simLC | Prosthecochloris sp. BS1                                | 4444192 | 483  | 450134  | 0.1  |
| simLC | Saccharophagus degradans 2-40                           | 5057531 | 582  | 538073  | 0.1  |
| simLC | Shewanella sp. W3-18-1                                  | 4754010 | 533  | 520544  | 0.1  |
| simLC | Syntrophomonas wolfei Goettingen                        | 2845772 | 314  | 311703  | 0.1  |
| simLC | Thiomicrospira crunogena XCL-2                          | 2427734 | 274  | 260697  | 0.1  |
| simLC | Burkholderia xenovorans LB400                           | 9731138 | 1149 | 934846  | 0.09 |
| simLC | Chlorobium vibrioforme f. thiosulfatophilum DSMZ 265(T) | 1980186 | 199  | 191789  | 0.09 |
| simLC | Chromohalobacter salexigens DSM3043                     | 4404049 | 454  | 423738  | 0.09 |
| simLC | Enterococcus faecium DO                                 | 2848380 | 359  | 260405  | 0.09 |
| simLC | Lactobacillus delbrueckii subsp. bulgaricus ATCCBAA-365 | 1629380 | 195  | 152277  | 0.09 |
| simLC | Mesorhizobium sp. BNC1                                  | 4977960 | 567  | 464795  | 0.09 |
| simLC | Methanococcoides burtonii DSM6242                       | 2575032 | 268  | 248743  | 0.09 |

|       |                                        |         |     |        |      |
|-------|----------------------------------------|---------|-----|--------|------|
| simLC | Methanosarcina barkeri Fusaro          | 4873766 | 545 | 468320 | 0.09 |
| simLC | Pseudomonas fluorescens PFO-1          | 6438405 | 730 | 599462 | 0.09 |
| simLC | Psychrobacter arcticum 273-4           | 2650701 | 327 | 258585 | 0.09 |
| simLC | Synechococcus sp. PCC 7942 (elongatus) | 2695903 | 316 | 266393 | 0.09 |
| simLC | Thermobifida fusca YX                  | 3642249 | 434 | 347485 | 0.09 |
| simLC | Oenococcus oeni PSU-1                  | 1782786 | 182 | 157278 | 0.08 |
| simLC | Rhodobacter sphaeroides 2.4.1          | 4603060 | 514 | 394254 | 0.08 |
| simLC | Lactobacillus brevis ATCC367           | 1880818 | 177 | 143668 | 0.07 |
| simLC | Streptococcus thermophilus LMD-9       | 1842121 | 178 | 146176 | 0.07 |

| dataset | organism                                                | genome size | reads | nucleotides | coverage |
|---------|---------------------------------------------------------|-------------|-------|-------------|----------|
| simHC   | Moorella thermoacetica ATCC 39073                       | 2628784     | 1426  | 1398111     | 0.53     |
| simHC   | Xylella fastidiosa Dixon                                | 2622328     | 1303  | 1151861     | 0.43     |
| simHC   | Silicibacter sp. TM1040                                 | 4198271     | 1065  | 1231412     | 0.29     |
| simHC   | Thiobacillus denitrificans ATCC 25259                   | 2909809     | 741   | 816370      | 0.28     |
| simHC   | Rubrobacter xylanophilus DSM 9941                       | 3299423     | 799   | 914531      | 0.27     |
| simHC   | Bacillus cereus NVH391-98                               | 3915845     | 1000  | 1029031     | 0.26     |
| simHC   | Burkholderia ambifaria AMMD                             | 7503613     | 1937  | 1965645     | 0.26     |
| simHC   | Burkholderia sp. sp.strain 383                          | 8676277     | 2191  | 2291772     | 0.26     |
| simHC   | Crocospaera watsonii WH 8501                            | 6285399     | 1593  | 1660878     | 0.26     |
| simHC   | Lactobacillus gasseri ATCC33323                         | 1950210     | 551   | 522829      | 0.26     |
| simHC   | Prosthecochloris aestuarii SK413/DSMZ 271(t)            | 2563197     | 692   | 666483      | 0.26     |
| simHC   | Pseudoalteromonas atlantica T6c                         | 5094958     | 1301  | 1348100     | 0.26     |
| simHC   | Pseudomonas putida F1                                   | 5925059     | 1528  | 1550308     | 0.26     |
| simHC   | Shewanella sp. MR-7                                     | 4546355     | 1177  | 1222489     | 0.26     |
| simHC   | Alkalilimnicola ehrlichei MLHE-1                        | 3272789     | 829   | 848181      | 0.25     |
| simHC   | Anaeromyxobacter dehalogenans 2CP-C                     | 5013479     | 1273  | 1294221     | 0.25     |
| simHC   | Bradyrhizobium sp. BTAi1                                | 8422430     | 2127  | 2168262     | 0.25     |
| simHC   | Chlorobium vibrioforme f. thiosulfatophilum DSMZ 265(T) | 1980186     | 534   | 508460      | 0.25     |
| simHC   | Jannaschia sp. CCS1                                     | 4404049     | 1148  | 1126137     | 0.25     |
| simHC   | Kineococcus radiotolerans SRS30216                      | 4893957     | 1187  | 1244349     | 0.25     |
| simHC   | Novosphingobium aromaticivorans DSM 12444 (F199)        | 3561584     | 1093  | 919296      | 0.25     |
| simHC   | Paracoccus denitrificans PD1222                         | 5175736     | 1362  | 1310669     | 0.25     |
| simHC   | Pelobacter propionicus                                  | 4466736     | 1145  | 1139116     | 0.25     |
| simHC   | Rhodopseudomonas palustris BisA53                       | 5502424     | 1392  | 1421441     | 0.25     |
| simHC   | Rhodopseudomonas palustris BisB18                       | 5513844     | 1348  | 1380045     | 0.25     |
| simHC   | Rhodopseudomonas palustris BisB5                        | 4892717     | 1200  | 1226193     | 0.25     |
| simHC   | Shewanella frigidimarina NCMB400                        | 4782427     | 1257  | 1229312     | 0.25     |
| simHC   | Shewanella sp. ANA-3                                    | 5100729     | 1279  | 1301783     | 0.25     |
| simHC   | Shewanella sp. W3-18-1                                  | 4754010     | 1214  | 1190652     | 0.25     |
| simHC   | Trichodesmium erythraeum IMS101                         | 7750108     | 2051  | 1981593     | 0.25     |
| simHC   | Actinobacillus succinogenes 130Z                        | 2046146     | 483   | 498948      | 0.24     |
| simHC   | Burkholderia vietnamiensis strain G4 (R1808)            | 8410976     | 2083  | 2079067     | 0.24     |
| simHC   | Caldicellulosiruptor accharolyticus                     | 2788317     | 658   | 678503      | 0.24     |
| simHC   | Chloroflexus aurantiacus J-10-fl                        | 5193782     | 1277  | 1273910     | 0.24     |
| simHC   | Clostridium beijerincki NCIMB 8052                      | 5952522     | 1411  | 1478182     | 0.24     |
| simHC   | Deinococcus geothermalis DSM11300                       | 3164085     | 809   | 784763      | 0.24     |
| simHC   | Marinobacter aquaeolei VT8                              | 4647952     | 1164  | 1153461     | 0.24     |
| simHC   | Methanococcoides burtonii DSM6242                       | 2575032     | 663   | 626141      | 0.24     |
| simHC   | Methanospirillum hungatei JF-1                          | 3544738     | 919   | 878282      | 0.24     |
| simHC   | Nitrobacter winogradskyi Nb-255                         | 3402093     | 857   | 827808      | 0.24     |
| simHC   | Nitrosococcus oceani                                    | 3522111     | 868   | 845789      | 0.24     |
| simHC   | Nitrospira multiformis ATCC 25196                       | 3234309     | 814   | 787922      | 0.24     |
| simHC   | Nocardioides sp. JS614                                  | 5394058     | 1337  | 1322166     | 0.24     |
| simHC   | Polaromonas sp. JS666                                   | 5898676     | 1489  | 1470833     | 0.24     |
| simHC   | Prochlorococcus sp. NATL2A                              | 1842899     | 480   | 454047      | 0.24     |
| simHC   | Psychrobacter cryopegella                               | 3101097     | 793   | 753295      | 0.24     |
| simHC   | Rhodoferrax ferrireducens                               | 4969784     | 1276  | 1205301     | 0.24     |
| simHC   | Rhodopseudomonas palustris HaA2                         | 5331656     | 1339  | 1285463     | 0.24     |
| simHC   | Saccharophagus degradans 2-40                           | 5057531     | 1324  | 1216610     | 0.24     |
| simHC   | Shewanella baltica OS155                                | 5084318     | 1313  | 1248252     | 0.24     |
| simHC   | Shewanella putefaciens                                  | 4577697     | 1153  | 1098913     | 0.24     |
| simHC   | Shewanella sp. PV-4                                     | 4474526     | 1165  | 1113033     | 0.24     |
| simHC   | Sphingopyxis alaskensis RB2256                          | 3343420     | 846   | 814347      | 0.24     |
| simHC   | Syntrophomonas wolfei Goettingen                        | 2845772     | 708   | 700280      | 0.24     |
| simHC   | Arthrobacter sp. FB24                                   | 5011599     | 1211  | 1189883     | 0.23     |
| simHC   | Burkholderia cenocepacia AU 1054                        | 7249477     | 1791  | 1685754     | 0.23     |
| simHC   | Burkholderia cenocepacia HI2424                         | 8139086     | 2045  | 1952351     | 0.23     |
| simHC   | Ehrlichia chaffeensis sapulpa                           | 1005812     | 255   | 234084      | 0.23     |
| simHC   | Exiguobacterium 255-15                                  | 2894116     | 788   | 675805      | 0.23     |
| simHC   | Frankia sp. Ccl3                                        | 5433628     | 1334  | 1297029     | 0.23     |
| simHC   | Frankia sp. EAN1pec                                     | 9081415     | 2248  | 2147660     | 0.23     |
| simHC   | Magnetococcus sp. MC-1                                  | 4628740     | 1153  | 1080744     | 0.23     |
| simHC   | Methylobacillus flagellatus strain KT                   | 2971517     | 687   | 687069      | 0.23     |

|       |                                                         |         |      |         |      |
|-------|---------------------------------------------------------|---------|------|---------|------|
| simHC | Nitrobacter hamburgensis                                | 5011522 | 1272 | 1195014 | 0.23 |
| simHC | Nitrosomonas eutropha C71                               | 2711982 | 649  | 641642  | 0.23 |
| simHC | Pelodictyon luteolum                                    | 2364842 | 581  | 553908  | 0.23 |
| simHC | Shewanella amazonensis                                  | 4264533 | 1055 | 1006623 | 0.23 |
| simHC | Streptococcus thermophilus LMD-9                        | 1842121 | 501  | 424310  | 0.23 |
| simHC | Thermoanaerobacter ethanolicus 39E                      | 2282740 | 570  | 531808  | 0.23 |
| simHC | Thiomicrospira crunogena XCL-2                          | 2427734 | 603  | 580140  | 0.23 |
| simHC | Alkaliphillus metalliredigenes                          | 4410303 | 1091 | 1003556 | 0.22 |
| simHC | Anabaena variabilis ATCC 29413                          | 7105752 | 1703 | 1588258 | 0.22 |
| simHC | Azotobacter vinelandii AvOP                             | 5352434 | 1311 | 1203185 | 0.22 |
| simHC | Chlorobium limicola DSMZ 245(T)                         | 2761915 | 671  | 621013  | 0.22 |
| simHC | Chlorobium phaeobacteroides DSMZ 266(T)                 | 3114286 | 719  | 685665  | 0.22 |
| simHC | Clostridium thermocellum ATCC 27405                     | 3894953 | 932  | 873934  | 0.22 |
| simHC | Desulfovibrio desulfuricans G20                         | 3730232 | 919  | 827764  | 0.22 |
| simHC | Geobacter metallireducens GS-15                         | 4011182 | 1025 | 921248  | 0.22 |
| simHC | Haemophilus somnus 129PT                                | 2008359 | 513  | 460529  | 0.22 |
| simHC | Pediococcus pentosaceus ATCC25745                       | 1814631 | 456  | 401147  | 0.22 |
| simHC | Pelodictyon phaeoclathratiforme BU-1 (DSMZ 5477(T))     | 3000217 | 703  | 667439  | 0.22 |
| simHC | Prochlorococcus marinus str. MIT 9312                   | 1709204 | 404  | 387898  | 0.22 |
| simHC | Prosthecochloris sp. BS1                                | 4444192 | 1082 | 1010075 | 0.22 |
| simHC | Pseudomonas syringae B728a                              | 6093698 | 1545 | 1376094 | 0.22 |
| simHC | Rhodospirillum rubrum ATCC 11170                        | 4406557 | 1062 | 979754  | 0.22 |
| simHC | Streptococcus suis 89/1591                              | 1978218 | 490  | 442547  | 0.22 |
| simHC | Syntrophobacter fumaroxidans MPOB                       | 4848841 | 1181 | 1088719 | 0.22 |
| simHC | Bifidobacterium longum DJO10A                           | 2375286 | 610  | 514147  | 0.21 |
| simHC | Dechloromonas aromatica RCB                             | 4501104 | 1132 | 961476  | 0.21 |
| simHC | Desulfitobacterium hafniense DCB-2                      | 6083768 | 1486 | 1320777 | 0.21 |
| simHC | Ehrlichia canis Jake                                    | 1315030 | 283  | 280181  | 0.21 |
| simHC | Lactobacillus casei ATCC334                             | 2760660 | 648  | 591179  | 0.21 |
| simHC | Mesorhizobium sp. BNC1                                  | 4977960 | 1289 | 1063210 | 0.21 |
| simHC | Methanosarcina barkeri Fusaro                           | 4873766 | 1213 | 1035194 | 0.21 |
| simHC | Pelobacter carbinolicus DSM 2380                        | 3662252 | 896  | 790429  | 0.21 |
| simHC | Brevibacterium linens BL2                               | 4510745 | 1088 | 939613  | 0.2  |
| simHC | Cytophaga hutchinsonii ATCC 33406                       | 4433218 | 1161 | 922724  | 0.2  |
| simHC | Ferroplasma acidarmanus fer1                            | 1971391 | 471  | 406946  | 0.2  |
| simHC | Lactococcus lactis subsp. cremoris                      | 2613164 | 584  | 540232  | 0.2  |
| simHC | Leuconostoc mesenteroides ATCC 8293                     | 1976579 | 473  | 403860  | 0.2  |
| simHC | Oenococcus oeni PSU-1                                   | 1782786 | 422  | 364338  | 0.2  |
| simHC | Pseudomonas fluorescens PfO-1                           | 6438405 | 1587 | 1291214 | 0.2  |
| simHC | Synechococcus sp. PCC 7942 (elongatus)                  | 2695903 | 646  | 548582  | 0.2  |
| simHC | Thermobifida fusca YX                                   | 3642249 | 930  | 736562  | 0.2  |
| simHC | Thiomicrospira denitrificans ATCC 33889                 | 2201561 | 490  | 461765  | 0.2  |
| simHC | Burkholderia xenovorans LB400                           | 9731138 | 2384 | 1941555 | 0.19 |
| simHC | Lactobacillus brevis ATCC367                            | 1880818 | 445  | 369397  | 0.19 |
| simHC | Chromohalobacter salexigens DSM3043                     | 4404049 | 888  | 827721  | 0.18 |
| simHC | Lactobacillus delbrueckii subsp. bulgaricus ATCCBAA-365 | 1629380 | 391  | 305369  | 0.18 |
| simHC | Psychrobacter arcticum 273-4                            | 2650701 | 623  | 500275  | 0.18 |
| simHC | Rhodobacter sphaeroides 2.4.1                           | 4603060 | 1119 | 857512  | 0.18 |
| simHC | Enterococcus faecium DO                                 | 2848380 | 676  | 496300  | 0.17 |
| simHC | Xylella fastidiosa Ann-1                                | 5118933 | 627  | 495925  | 0.09 |
