# Supplementary material for: Use of simulated data sets to evaluate the fidelity of metagenomic processing methods
Source: Springer Nature journal article supplement (doi:10.1038/nmeth1043), 2007-04-29
Supplement: 41592_2007_BFnmeth1043_MOESM253_ESM.pdf [file 41592_2007_BFnmeth1043_MOESM253_ESM.pdf]

Supplementary Table 2. Binning summary for contigs larger than 8 Kb and larger than 10 reads. The numbers of bins generated by each method, the corresponding number of contigs and average and standard deviation of specificity and sensitivity values for each combination of assembly / binning method used are rerorted.

| Dataset               | Bin method               | Assembler | Number of bins | Binned contigs | Binned sequence (bp) | Specificity (average) | Sensitivity (std deviation) | Specificity (average) | Sensitivity (std deviation) |
|-----------------------|--------------------------|-----------|----------------|----------------|----------------------|-----------------------|-----------------------------|-----------------------|-----------------------------|
| <b>Contigs ≥ 8 Kb</b> |                          |           |                |                |                      |                       |                             |                       |                             |
| simMC                 | kmer (7mer)              | Arachne   | 2              | 301            | 4095911              | 0                     | 0                           | 0                     | 0                           |
| simMC                 | kmer (7mer)              | JAZZ      | 11             | 106            | 4812668              | 0                     | 0                           | 0                     | 0                           |
| simMC                 | kmer (7mer)              | Phrap     | 3              | 400            | 4821064              | 0                     | 0                           | 0                     | 0                           |
| simMC                 | kmer (8mer)              | Arachne   | 6              | 299            | 4079262              | 0                     | 0                           | 0                     | 0                           |
| simMC                 | kmer (8mer)              | JAZZ      | 5              | 187            | 5818024              | 0                     | 0                           | 0                     | 0                           |
| simMC                 | kmer (8mer)              | Phrap     | 8              | 401            | 4830758              | 0                     | 0                           | 0                     | 0                           |
| simMC                 | gen PhyloPythia (p:0.5)  | Arachne   | 5              | 301            | 4095911              | 0.99                  | 0                           | 0.52                  | 0.26                        |
| simMC                 | gen PhyloPythia (p:0.5)  | JAZZ      | 4              | 189            | 6374176              | 0.94                  | 0.11                        | 0.71                  | 0.45                        |
| simMC                 | gen PhyloPythia (p:0.5)  | Phrap     | 4              | 399            | 4809606              | 1                     | 0                           | 0.5                   | 0.38                        |
| simMC                 | gen PhyloPythia (p:0.85) | Arachne   | 7              | 299            | 4071575              | 1                     | 0                           | 0.28                  | 0.34                        |
| simMC                 | gen PhyloPythia (p:0.85) | JAZZ      | 7              | 166            | 6006127              | 0.97                  | 0.06                        | 0.35                  | 0.42                        |
| simMC                 | gen PhyloPythia (p:0.85) | Phrap     | 8              | 393            | 4732465              | 1                     | 0                           | 0.24                  | 0.26                        |
| simMC                 | ssp PhyloPythia (p:0.5)  | Arachne   | 2              | 301            | 4095911              | 1                     | 0                           | 1                     | 0                           |
| simMC                 | ssp PhyloPythia (p:0.5)  | JAZZ      | 2              | 84             | 2557665              | 1                     | 0                           | 0.61                  | 0                           |
| simMC                 | ssp PhyloPythia (p:0.5)  | Phrap     | 2              | 399            | 4809606              | 1                     | 0                           | 0.99                  | 0                           |
| simMC                 | ssp PhyloPythia (p:0.85) | Arachne   | 5              | 301            | 4095911              | 1                     | 0                           | 0.39                  | 0.42                        |
| simMC                 | ssp PhyloPythia (p:0.85) | JAZZ      | 4              | 82             | 2540978              | 1                     | 0                           | 0.28                  | 0.44                        |
| simMC                 | ssp PhyloPythia (p:0.85) | Phrap     | 6              | 401            | 4830758              | 1                     | 0                           | 0.32                  | 0.38                        |
| simMC                 | BLAST distr 1            | Arachne   | 3              | 263            | 3609443              | 0.59                  | 0.52                        | 0.53                  | 0.47                        |
| simMC                 | BLAST distr 1            | JAZZ      | 3              | 165            | 5118293              | 0.57                  | 0.51                        | 0.51                  | 0.45                        |
| simMC                 | BLAST distr 1            | Phrap     | 3              | 337            | 4074262              | 0.57                  | 0.51                        | 0.51                  | 0.45                        |
| simMC                 | BLAST distr 2            | Arachne   | 3              | 283            | 3838263              | 0.57                  | 0.51                        | 0.54                  | 0.49                        |
| simMC                 | BLAST distr 2            | JAZZ      | 3              | 186            | 6139934              | 0.57                  | 0.51                        | 0.58                  | 0.51                        |
| simMC                 | BLAST distr 2            | Phrap     | 4              | 379            | 4534815              | 0.42                  | 0.5                         | 0.41                  | 0.48                        |
| simLC                 | kmer (7mer)              | Arachne   | 3              | 202            | 4593193              | 0                     | 0                           | 0                     | 0                           |
| simLC                 | kmer (7mer)              | JAZZ      | 2              | 5              | 4532132              | 0                     | 0                           | 0                     | 0                           |
| simLC                 | kmer (7mer)              | Phrap     | 2              | 229            | 4693257              | 0                     | 0                           | 0                     | 0                           |
| simLC                 | kmer (8mer)              | Arachne   | 9              | 200            | 4498207              | 0                     | 0                           | 0                     | 0                           |
| simLC                 | kmer (8mer)              | JAZZ      | 2              | 6              | 700002               | 0                     | 0                           | 0                     | 0                           |
| simLC                 | kmer (8mer)              | Phrap     | 5              | 225            | 4532759              | 0                     | 0                           | 0                     | 0                           |
| simLC                 | gen PhyloPythia (p:0.5)  | Arachne   | 2              | 201            | 4584828              | 1                     | 0                           | 0.49                  | 0                           |
| simLC                 | gen PhyloPythia (p:0.5)  | JAZZ      | 1              | 10             | 4599929              | 0.8                   | 0                           | 1                     | 0                           |
| simLC                 | gen PhyloPythia (p:0.5)  | Phrap     | 2              | 227            | 4675877              | 1                     | 0                           | 0.5                   | 0                           |
| simLC                 | gen PhyloPythia (p:0.85) | Arachne   | 5              | 202            | 4593193              | 1                     | 0                           | 0.19                  | 0.25                        |
| simLC                 | gen PhyloPythia (p:0.85) | JAZZ      | 2              | 9              | 4586966              | 1                     | 0                           | 0.53                  | 0                           |
| simLC                 | gen PhyloPythia (p:0.85) | Phrap     | 4              | 227            | 4669347              | 1                     | 0                           | 0.24                  | 0.36                        |
| simLC                 | ssp PhyloPythia (p:0.5)  | Arachne   | 1              | 201            | 4584828              | 1                     | 0                           | 0.99                  | 0                           |
| simLC                 | ssp PhyloPythia (p:0.5)  | JAZZ      | 1              | 8              | 3356926              | 1                     | 0                           | 0.8                   | 0                           |
| simLC                 | ssp PhyloPythia (p:0.5)  | Phrap     | 1              | 227            | 4675877              | 1                     | 0                           | 0.99                  | 0                           |
| simLC                 | ssp PhyloPythia (p:0.85) | Arachne   | 4              | 202            | 4593193              | 1                     | 0                           | 0.24                  | 0.39                        |
| simLC                 | ssp PhyloPythia (p:0.85) | JAZZ      | 1              | 7              | 3348171              | 1                     | 0                           | 0.7                   | 0                           |
| simLC                 | ssp PhyloPythia (p:0.85) | Phrap     | 3              | 227            | 4669347              | 1                     | 0                           | 0.32                  | 0.41                        |
| simLC                 | BLAST distr 1            | Arachne   | 3              | 176            | 4117374              | 0.33                  | 0.57                        | 0.24                  | 0.42                        |

|       |                          |         |   |     |         |      |      |      |      |
|-------|--------------------------|---------|---|-----|---------|------|------|------|------|
| simLC | BLAST distr 1            | JAZZ    | 1 | 8   | 4571693 | 1    | 0    | 0.8  | 0    |
| simLC | BLAST distr 1            | Phrap   | 3 | 193 | 4115220 | 0.33 | 0.57 | 0.23 | 0.4  |
| simLC | BLAST distr 2            | Arachne | 3 | 197 | 4503351 | 0.33 | 0.57 | 0.26 | 0.45 |
| simLC | BLAST distr 2            | JAZZ    | 1 | 8   | 4571693 | 1    | 0    | 0.8  | 0    |
| simLC | BLAST distr 2            | Phrap   | 3 | 221 | 4586553 | 0.33 | 0.57 | 0.26 | 0.45 |
| simHC | kmer (7mer)              | Arachne | 0 | 0   | 0       | 0    | 0    | 0    | 0    |
| simHC | kmer (7mer)              | JAZZ    | 0 | 0   | 0       | 0    | 0    | 0    | 0    |
| simHC | kmer (7mer)              | Phrap   | 0 | 0   | 0       | 0    | 0    | 0    | 0    |
| simHC | kmer (8mer)              | Arachne | 0 | 0   | 0       | 0    | 0    | 0    | 0    |
| simHC | kmer (8mer)              | JAZZ    | 0 | 0   | 0       | 0    | 0    | 0    | 0    |
| simHC | kmer (8mer)              | Phrap   | 0 | 0   | 0       | 0    | 0    | 0    | 0    |
| simHC | gen PhyloPythia (p:0.5)  | Arachne | 0 | 0   | 0       | 0    | 0    | 0    | 0    |
| simHC | gen PhyloPythia (p:0.5)  | JAZZ    | 0 | 0   | 0       | 0    | 0    | 0    | 0    |
| simHC | gen PhyloPythia (p:0.5)  | Phrap   | 0 | 0   | 0       | 0    | 0    | 0    | 0    |
| simHC | gen PhyloPythia (p:0.85) | Arachne | 0 | 0   | 0       | 0    | 0    | 0    | 0    |
| simHC | gen PhyloPythia (p:0.85) | JAZZ    | 0 | 0   | 0       | 0    | 0    | 0    | 0    |
| simHC | gen PhyloPythia (p:0.85) | Phrap   | 0 | 0   | 0       | 0    | 0    | 0    | 0    |
| simHC | ssp PhyloPythia (p:0.5)  | Arachne | 0 | 0   | 0       | 0    | 0    | 0    | 0    |
| simHC | ssp PhyloPythia (p:0.5)  | JAZZ    | 0 | 0   | 0       | 0    | 0    | 0    | 0    |
| simHC | ssp PhyloPythia (p:0.5)  | Phrap   | 0 | 0   | 0       | 0    | 0    | 0    | 0    |
| simHC | ssp PhyloPythia (p:0.85) | Arachne | 0 | 0   | 0       | 0    | 0    | 0    | 0    |
| simHC | ssp PhyloPythia (p:0.85) | JAZZ    | 0 | 0   | 0       | 0    | 0    | 0    | 0    |
| simHC | ssp PhyloPythia (p:0.85) | Phrap   | 0 | 0   | 0       | 0    | 0    | 0    | 0    |
| simHC | BLAST distr 1            | Arachne | 0 | 0   | 0       | 0    | 0    | 0    | 0    |
| simHC | BLAST distr 1            | JAZZ    | 0 | 0   | 0       | 0    | 0    | 0    | 0    |
| simHC | BLAST distr 1            | Phrap   | 0 | 0   | 0       | 0    | 0    | 0    | 0    |
| simHC | BLAST distr 2            | Arachne | 0 | 0   | 0       | 0    | 0    | 0    | 0    |
| simHC | BLAST distr 2            | JAZZ    | 0 | 0   | 0       | 0    | 0    | 0    | 0    |
| simHC | BLAST distr 2            | Phrap   | 0 | 0   | 0       | 0    | 0    | 0    | 0    |

**Contigs  $\geq$  10 reads**

|       |                          |         |    |      |          |      |      |      |      |
|-------|--------------------------|---------|----|------|----------|------|------|------|------|
| simMC | kmer (7mer)              | Arachne | 5  | 1370 | 8980208  | 0    | 0    | 0    | 0    |
| simMC | kmer (7mer)              | JAZZ    | 12 | 180  | 5119994  | 0.02 | 0.09 | 0    | 0    |
| simMC | kmer (7mer)              | Phrap   | 6  | 1979 | 12120490 | 0    | 0    | 0    | 0    |
| simMC | kmer (8mer)              | Arachne | 9  | 1370 | 8973285  | 0    | 0    | 0    | 0    |
| simMC | kmer (8mer)              | JAZZ    | 6  | 275  | 6284303  | 0.1  | 0.24 | 0    | 0.01 |
| simMC | kmer (8mer)              | Phrap   | 9  | 1980 | 12125109 | 0    | 0    | 0    | 0    |
| simMC | gen PhyloPythia (p:0.5)  | Arachne | 14 | 1362 | 8952723  | 0.72 | 0.41 | 0.27 | 0.32 |
| simMC | gen PhyloPythia (p:0.5)  | JAZZ    | 8  | 455  | 7573326  | 0.84 | 0.34 | 0.47 | 0.44 |
| simMC | gen PhyloPythia (p:0.5)  | Phrap   | 20 | 1975 | 12108429 | 0.49 | 0.47 | 0.13 | 0.2  |
| simMC | gen PhyloPythia (p:0.85) | Arachne | 10 | 1341 | 8860872  | 0.89 | 0.31 | 0.18 | 0.14 |
| simMC | gen PhyloPythia (p:0.85) | JAZZ    | 10 | 402  | 7037119  | 0.88 | 0.31 | 0.24 | 0.32 |
| simMC | gen PhyloPythia (p:0.85) | Phrap   | 11 | 1920 | 11858567 | 0.89 | 0.3  | 0.17 | 0.12 |
| simMC | ssp PhyloPythia (p:0.5)  | Arachne | 13 | 1364 | 8960567  | 0.55 | 0.47 | 0.26 | 0.37 |
| simMC | ssp PhyloPythia (p:0.5)  | JAZZ    | 7  | 191  | 2992441  | 0.85 | 0.37 | 0.3  | 0.43 |
| simMC | ssp PhyloPythia (p:0.5)  | Phrap   | 17 | 1975 | 12108429 | 0.41 | 0.47 | 0.15 | 0.26 |
| simMC | ssp PhyloPythia (p:0.85) | Arachne | 7  | 1356 | 8939585  | 0.85 | 0.37 | 0.23 | 0.19 |
| simMC | ssp PhyloPythia (p:0.85) | JAZZ    | 8  | 188  | 2987393  | 0.75 | 0.46 | 0.11 | 0.21 |
| simMC | ssp PhyloPythia (p:0.85) | Phrap   | 8  | 1939 | 12009353 | 0.87 | 0.35 | 0.24 | 0.16 |

|       |                          |         |    |      |          |      |      |      |      |
|-------|--------------------------|---------|----|------|----------|------|------|------|------|
| simMC | BLAST distr 1            | Arachne | 12 | 1046 | 7268264  | 0.13 | 0.32 | 0.1  | 0.25 |
| simMC | BLAST distr 1            | JAZZ    | 5  | 364  | 6015063  | 0.33 | 0.47 | 0.27 | 0.38 |
| simMC | BLAST distr 1            | Phrap   | 11 | 1492 | 9546305  | 0.15 | 0.35 | 0.14 | 0.26 |
| simMC | BLAST distr 2            | Arachne | 13 | 1249 | 8332463  | 0.12 | 0.31 | 0.11 | 0.27 |
| simMC | BLAST distr 2            | JAZZ    | 6  | 438  | 7276557  | 0.27 | 0.43 | 0.26 | 0.4  |
| simMC | BLAST distr 2            | Phrap   | 14 | 1795 | 11223276 | 0.15 | 0.32 | 0.2  | 0.35 |
| simLC | kmer (7mer)              | Arachne | 4  | 367  | 5335933  | 0    | 0    | 0    | 0    |
| simLC | kmer (7mer)              | JAZZ    | 4  | 21   | 4602690  | 0    | 0    | 0    | 0    |
| simLC | kmer (7mer)              | Phrap   | 5  | 476  | 5793374  | 0    | 0    | 0    | 0    |
| simLC | kmer (8mer)              | Arachne | 12 | 365  | 5245412  | 0    | 0    | 0    | 0    |
| simLC | kmer (8mer)              | JAZZ    | 5  | 40   | 825822   | 0.02 | 0.04 | 0.2  | 0.44 |
| simLC | kmer (8mer)              | Phrap   | 14 | 480  | 5805508  | 0    | 0    | 0    | 0    |
| simLC | gen PhyloPythia (p:0.5)  | Arachne | 9  | 365  | 5329161  | 0.78 | 0.34 | 0.37 | 0.35 |
| simLC | gen PhyloPythia (p:0.5)  | JAZZ    | 3  | 59   | 4808896  | 0.81 | 0.31 | 0.88 | 0.19 |
| simLC | gen PhyloPythia (p:0.5)  | Phrap   | 10 | 468  | 5763480  | 0.77 | 0.34 | 0.34 | 0.38 |
| simLC | gen PhyloPythia (p:0.85) | Arachne | 9  | 365  | 5329161  | 0.78 | 0.35 | 0.23 | 0.17 |
| simLC | gen PhyloPythia (p:0.85) | JAZZ    | 2  | 41   | 4721876  | 0.81 | 0    | 0.49 | 0    |
| simLC | gen PhyloPythia (p:0.85) | Phrap   | 10 | 446  | 5677021  | 0.89 | 0.31 | 0.31 | 0.29 |
| simLC | ssp PhyloPythia (p:0.5)  | Arachne | 9  | 366  | 5332615  | 0.84 | 0.31 | 0.41 | 0.36 |
| simLC | ssp PhyloPythia (p:0.5)  | JAZZ    | 4  | 26   | 3422121  | 1    | 0    | 0.5  | 0.4  |
| simLC | ssp PhyloPythia (p:0.5)  | Phrap   | 9  | 470  | 5769303  | 0.76 | 0.33 | 0.37 | 0.39 |
| simLC | ssp PhyloPythia (p:0.85) | Arachne | 8  | 365  | 5329161  | 0.81 | 0.37 | 0.25 | 0.21 |
| simLC | ssp PhyloPythia (p:0.85) | JAZZ    | 4  | 23   | 3412668  | 1    | 0    | 0.09 | 0.06 |
| simLC | ssp PhyloPythia (p:0.85) | Phrap   | 9  | 447  | 5679501  | 0.88 | 0.33 | 0.34 | 0.29 |
| simLC | BLAST distr 1            | Arachne | 4  | 284  | 4617888  | 0.28 | 0.47 | 0.33 | 0.39 |
| simLC | BLAST distr 1            | JAZZ    | 4  | 43   | 4715696  | 0.32 | 0.47 | 0.37 | 0.47 |
| simLC | BLAST distr 1            | Phrap   | 6  | 349  | 4816881  | 0.21 | 0.4  | 0.21 | 0.34 |
| simLC | BLAST distr 2            | Arachne | 7  | 338  | 5184157  | 0.15 | 0.37 | 0.2  | 0.34 |
| simLC | BLAST distr 2            | JAZZ    | 5  | 54   | 4776187  | 0.24 | 0.43 | 0.32 | 0.46 |
| simLC | BLAST distr 2            | Phrap   | 10 | 429  | 5539910  | 0.17 | 0.33 | 0.24 | 0.4  |
| simHC | kmer (7mer)              | Arachne | 1  | 19   | 58241    | 0    | 0    | 0    | 0    |
| simHC | kmer (7mer)              | JAZZ    | 1  | 9    | 23975    | 0.11 | 0    | 1    | 0    |
| simHC | kmer (7mer)              | Phrap   | 6  | 84   | 290705   | 0    | 0    | 0    | 0    |
| simHC | kmer (8mer)              | Arachne | 2  | 20   | 64194    | 0    | 0    | 0    | 0    |
| simHC | kmer (8mer)              | JAZZ    | 3  | 16   | 60293    | 0.04 | 0.06 | 0.33 | 0.57 |
| simHC | kmer (8mer)              | Phrap   | 10 | 82   | 286224   | 0    | 0    | 0    | 0    |
| simHC | gen PhyloPythia (p:0.5)  | Arachne | 0  | 0    | 0        | 0    | 0    | 0    | 0    |
| simHC | gen PhyloPythia (p:0.5)  | JAZZ    | 0  | 0    | 0        | 0    | 0    | 0    | 0    |
| simHC | gen PhyloPythia (p:0.5)  | Phrap   | 0  | 0    | 0        | 0    | 0    | 0    | 0    |
| simHC | gen PhyloPythia (p:0.85) | Arachne | 0  | 0    | 0        | 0    | 0    | 0    | 0    |
| simHC | gen PhyloPythia (p:0.85) | JAZZ    | 0  | 0    | 0        | 0    | 0    | 0    | 0    |
| simHC | gen PhyloPythia (p:0.85) | Phrap   | 0  | 0    | 0        | 0    | 0    | 0    | 0    |
| simHC | ssp PhyloPythia (p:0.5)  | Arachne | 6  | 16   | 54304    | 0.61 | 0.37 | 0.29 | 0.21 |
| simHC | ssp PhyloPythia (p:0.5)  | JAZZ    | 3  | 7    | 34152    | 0.83 | 0.28 | 0.35 | 0.16 |
| simHC | ssp PhyloPythia (p:0.5)  | Phrap   | 16 | 77   | 264885   | 0.67 | 0.36 | 0.33 | 0.32 |
| simHC | ssp PhyloPythia (p:0.85) | Arachne | 4  | 15   | 46716    | 0.93 | 0.12 | 0.3  | 0.1  |
| simHC | ssp PhyloPythia (p:0.85) | JAZZ    | 3  | 9    | 38819    | 0.83 | 0.28 | 0.39 | 0.1  |
| simHC | ssp PhyloPythia (p:0.85) | Phrap   | 14 | 72   | 256853   | 0.73 | 0.37 | 0.25 | 0.21 |
| simHC | BLAST distr 1            | Arachne | 2  | 9    | 30224    | 0.4  | 0    | 0.28 | 0    |
| simHC | BLAST distr 1            | JAZZ    | 1  | 3    | 10733    | 0.66 | 0    | 0.4  | 0    |
| simHC | BLAST distr 1            | Phrap   | 6  | 33   | 112873   | 0.65 | 0.38 | 0.4  | 0.28 |

|       |               |         |   |    |        |      |      |      |      |
|-------|---------------|---------|---|----|--------|------|------|------|------|
| simHC | BLAST distr 2 | Arachne | 5 | 15 | 45008  | 0.16 | 0.35 | 0.11 | 0.25 |
| simHC | BLAST distr 2 | JAZZ    | 2 | 5  | 19354  | 0.33 | 0    | 0.2  | 0    |
| simHC | BLAST distr 2 | Phrap   | 9 | 49 | 163151 | 0.47 | 0.34 | 0.49 | 0.39 |
